# Supplementary material
Source: PubMed Central journal article supplement (PMC1201593)

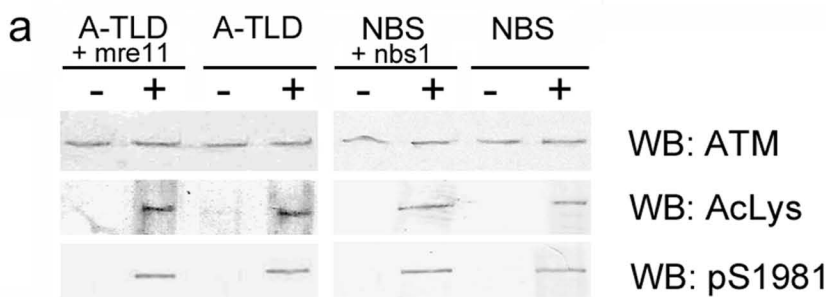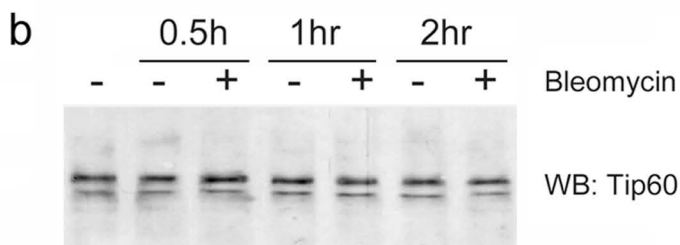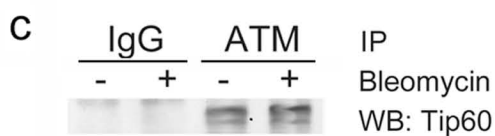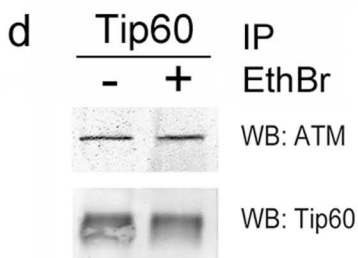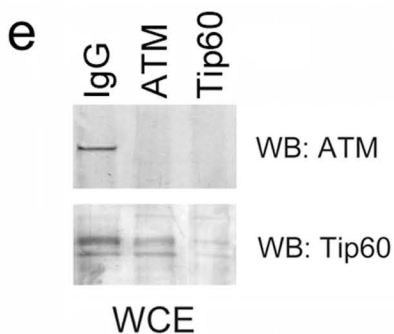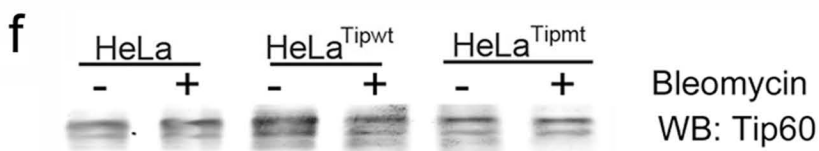

Supplement: pnas_0504211102_1.pdf [file pnas_0504211102_1.pdf]

Control

0.5Gy

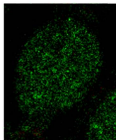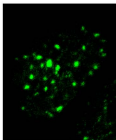

Tip60

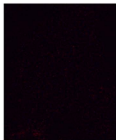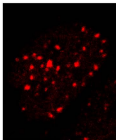

pH2AX

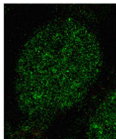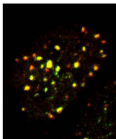

Merge

Supplement: pnas_0504211102_2.pdf [file pnas_0504211102_2.pdf]
